# Supplementary material
Source: Royal Society of Chemistry journal article supplement (doi:10.1039/d6cp00347h)
Supplement: d6cp00347h1.pdf [file d6cp00347h1.pdf]

# Electronic Supplementary Information: Anti-Kasha emission in DCM-IFC: Computational evaluation of the Type III separated wave function hypothesis

Pratip Chakraborty\*, James N. Bull, Stephen R. Meech\*, and Garth A. Jones\*

*School of Chemistry, Pharmacy and Pharmacology, University of East Anglia, Norwich NR4 7TJ, UK*

## Contents

|    |                                                                                                                                         |     |
|----|-----------------------------------------------------------------------------------------------------------------------------------------|-----|
| 1  | Natural transition orbitals (NTOs) for DCM-IFC (open)                                                                                   | S2  |
| 2  | Active space orbitals employed for neutral DCM-IFC (open)                                                                               | S3  |
| 3  | Vertical excitation energies (VEEs) at the FC region between TDA and TD-DFT methods                                                     | S4  |
| 4  | Simulated absorption spectra of DCM-IFC (open) with geometries sampled via classical thermostat AIMD                                    | S5  |
| 5  | Linearly interpolated pathways in internal coordinate (LIIC) between $S_2$ optimised geometry and $S_2/S_1$ -intersection region        | S6  |
| 6  | Linearly interpolated pathways in internal coordinate (LIIC) between $S_2/S_1$ -intersection region and $S_1$ optimised geometry        | S8  |
| 7  | Excited state sampling via QT-AIMD                                                                                                      | S10 |
| 8  | Cartesian Coordinates (in Å) of $S_0$ minimum geometry of DCM-IFC (open)                                                                | S11 |
| 9  | Cartesian Coordinates (in Å) of $S_2$ minimum geometry of DCM-IFC (open)                                                                | S13 |
| 10 | Cartesian Coordinates (in Å) of $S_1$ minimum geometry of DCM-IFC (open)                                                                | S16 |
| 11 | Cartesian Coordinates (in Å) of $S_2/S_1$ -intersection region (conical intersection not converged) of DCM-IFC (open)                   | S19 |
| 12 | Frequencies ( $\text{cm}^{-1}$ ) and IR intensities ( $\text{km/mol}$ ) of normal modes of DCM-IFC (open) at M06-2X/def2-SVP/SMD(water) | S22 |

# 1 Natural transition orbitals (NTOs) for DCM-IFC (open)

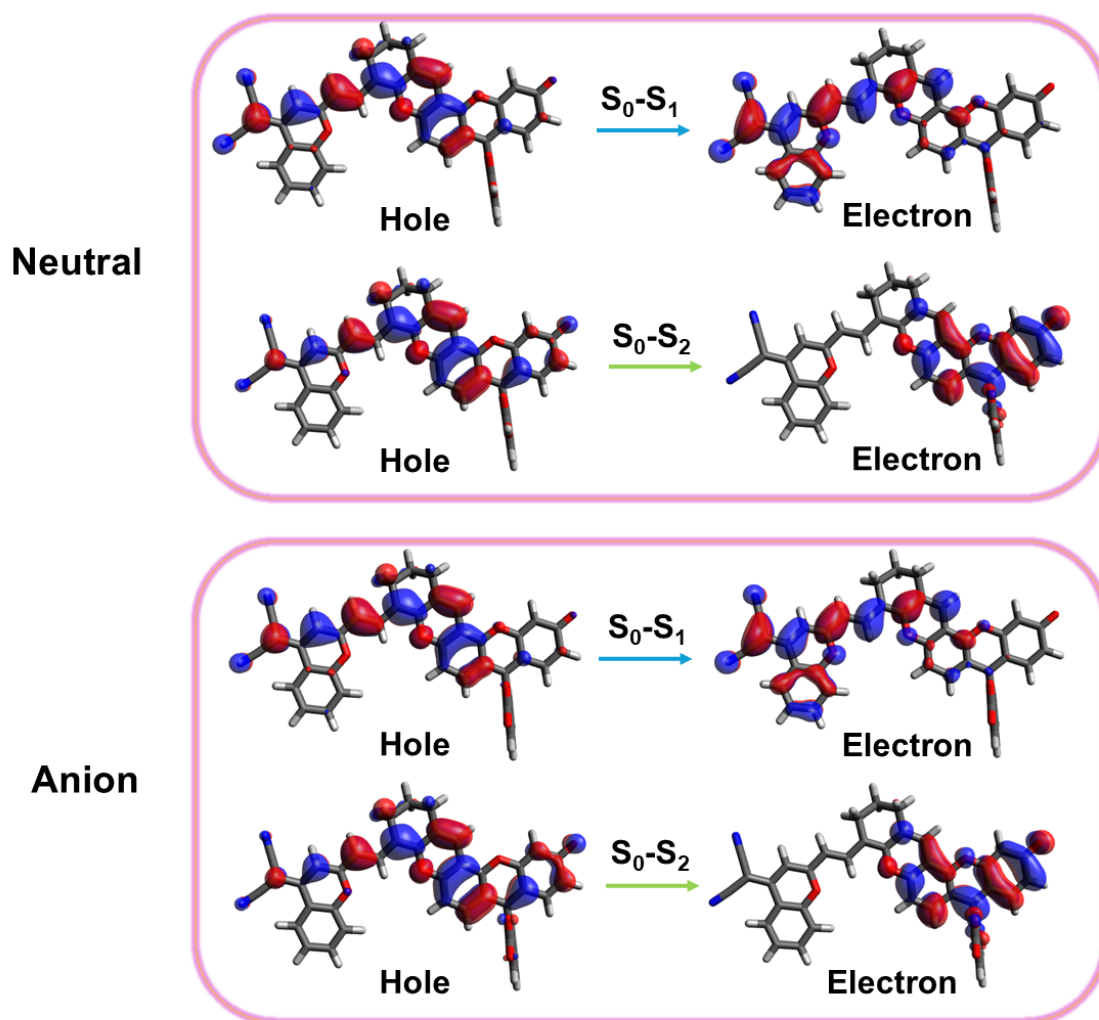

Figure S1: NTOs associated with  $S_0 \rightarrow S_1$  and  $S_0 \rightarrow S_2$  transitions for neutral and anion DCM-IFC (open) at the Franck-Condon (FC) region at M06-2X/def2-SVP/SMD(water) level.

## 2 Active space orbitals employed for neutral DCM-IFC (open)

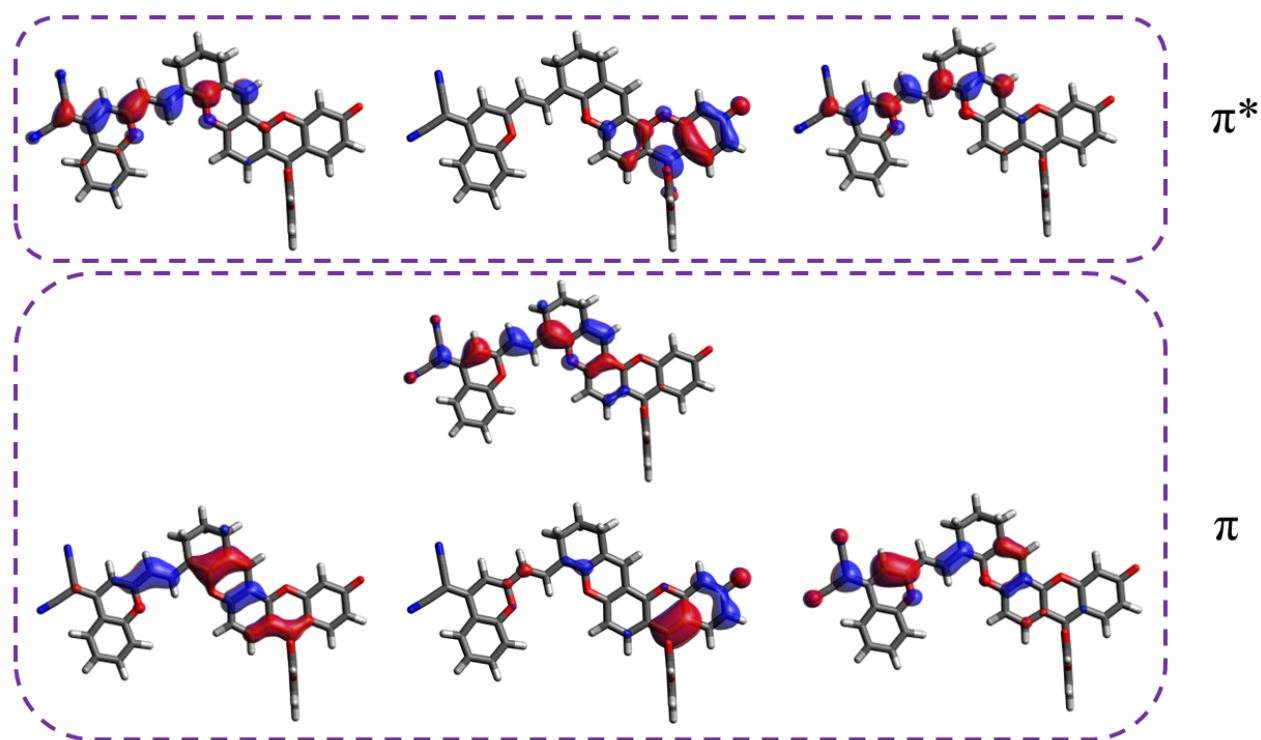

Figure S2: An active space of 8 electrons in 7 orbitals were used for the NEVPT2 single point calculations relevant to the neutral form of DCM-IFC (open). All of these orbitals (in addition to the three dominant orbitals) have contributions to the excitations and were required to reproduce the energy gap at the Franck-Condon region. A similar active space did not converge for the anionic form and no NEVPT2 single point calculations were performed for the anionic form.

### 3 Vertical excitation energies (VEEs) at the FC region between TDA and TD-DFT methods

Table S1: **DCM-IFC (open) neutral:** VEEs and oscillator strengths ( $f$ ) associated with the lowest two excited states using M06-2X/def2-SVP/SMD (water) at the TDA and TD-DFT level.  $S_0$  minimum geometry at TD-DFT-M06-2X/def2-SVP/SMD (water) was used. VEEs at TDA level are blue-shifted by  $\sim 0.1$  eV compared to TD-DFT level, but the states retain the same energetic ordering.

| Method | State | Energy (eV) | $f$  |
|--------|-------|-------------|------|
| TD-DFT | $S_1$ | 2.552       | 2.06 |
|        | $S_2$ | 3.050       | 0.17 |
| TDA    | $S_1$ | 2.659       | 2.47 |
|        | $S_2$ | 3.124       | 0.09 |

Table S2: **DCM-IFC (open) anion:** VEEs and oscillator strengths ( $f$ ) associated with the lowest two excited states using M06-2X/def2-SVP/SMD (water) at the TDA and TD-DFT level.  $S_0$  minimum geometry at TD-DFT-M06-2X/def2-SVP/SMD (water) was used. VEEs at TDA level are blue-shifted by  $\sim 0.1$  eV compared to TD-DFT level, but the states retain the same energetic ordering.

| Method | State | Energy (eV) | $f$  |
|--------|-------|-------------|------|
| TD-DFT | $S_1$ | 2.539       | 2.01 |
|        | $S_2$ | 3.119       | 0.23 |
| TDA    | $S_1$ | 2.646       | 2.41 |
|        | $S_2$ | 3.201       | 0.13 |

#### 4 Simulated absorption spectra of DCM-IFC (open) with geometries sampled via classical thermostat AIMD

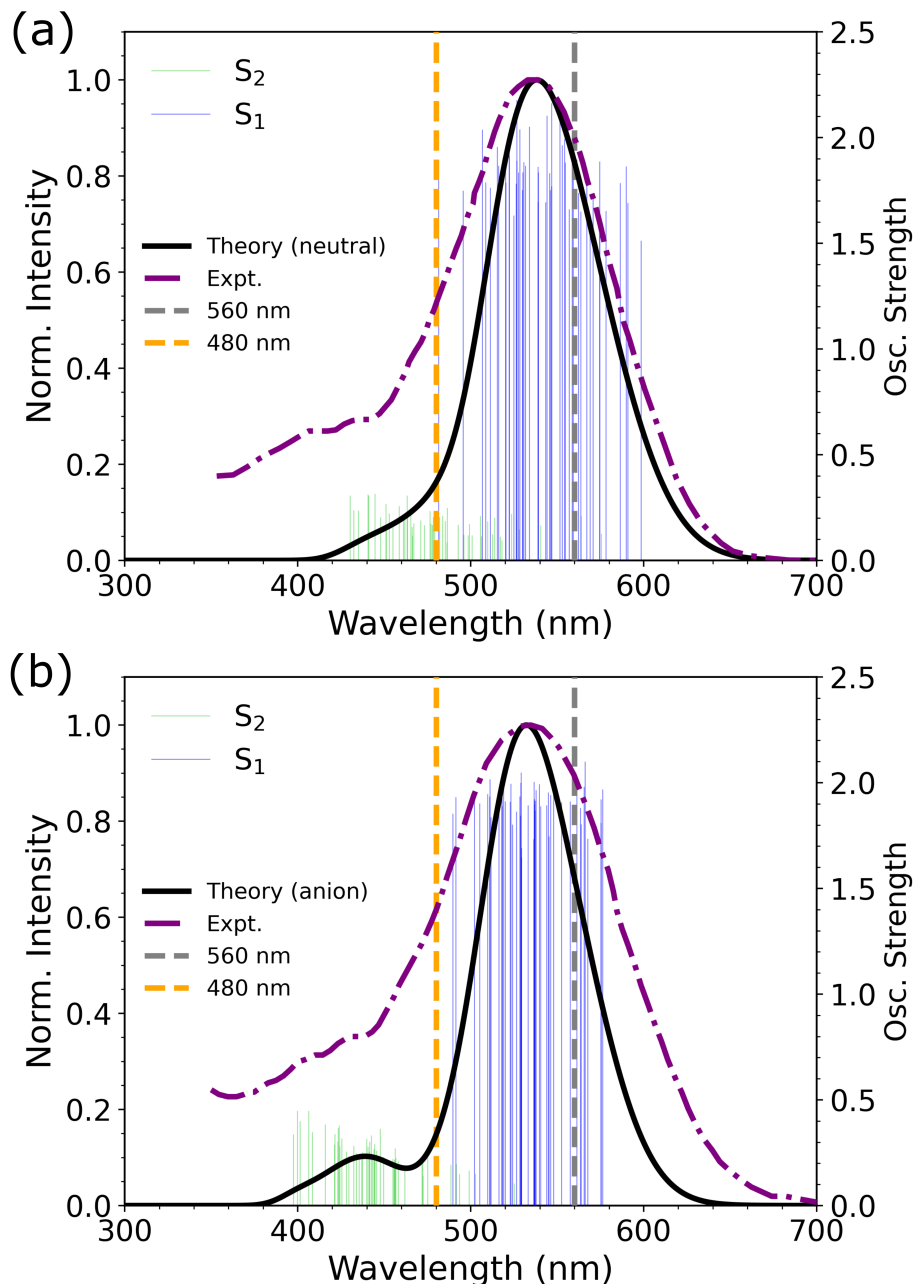

Figure S3: Absorption Spectra of the (a) neutral form and the (b) anion form of DCM-IFC (open) simulated from calculating VEEs and oscillator strengths at TD-M06-2X/def2-SVP/SMD (water) level with geometries sampled from classical thermostat AIMD. VEEs were updated using the cLR formalism. The resultant stick spectra were convolved with a gaussian with FWHM of 0.2 eV and redshifted by 0.29 and 0.25 eV for the neutral and the anion to match with the experimental absorption maximum of DCM-IFC-ester (open) (digitised and normalised from the SI of Ref 1) and anionic DCM-IFC (open) (digitised and normalised from Ref 2), respectively.

## 5 Linearly interpolated pathways in internal coordinate (LIIC) between $S_2$ optimised geometry and $S_2/S_1$ -intersection region

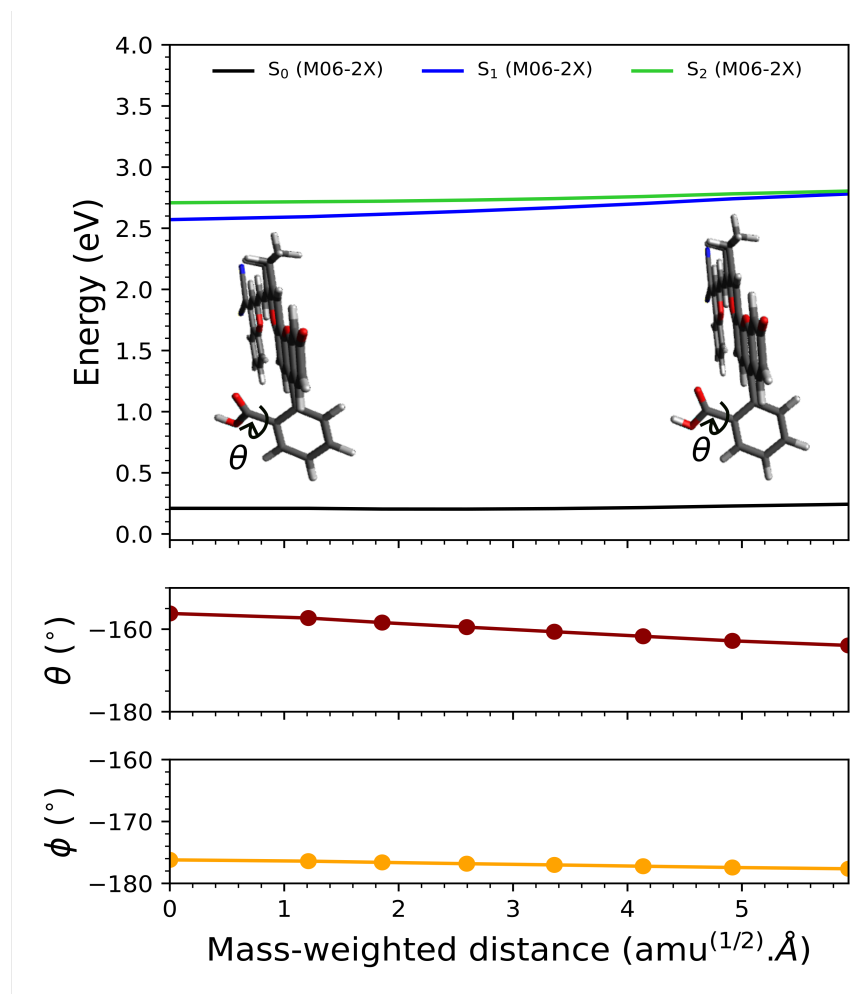

Figure S4: Relative energies (top panel) along LIIC pathways from the  $S_2$  optimised geometry to  $S_2/S_1$ -intersection region for the neutral DCM-IFC (open) with the important torsions (dihedral angles)  $\theta$  (middle panel) and  $\phi$  (bottom panel) along the same LIIC. Energies are calculated relative to the ground state energy at the same level of theory at the neutral FC geometry. Energy difference between  $S_2$  and  $S_1$  at the  $S_2$  optimised geometry is 0.14 eV. The barrier to reach the  $S_2/S_1$ -intersection region from the  $S_2$  optimised geometry is  $\leq 0.02$  eV.

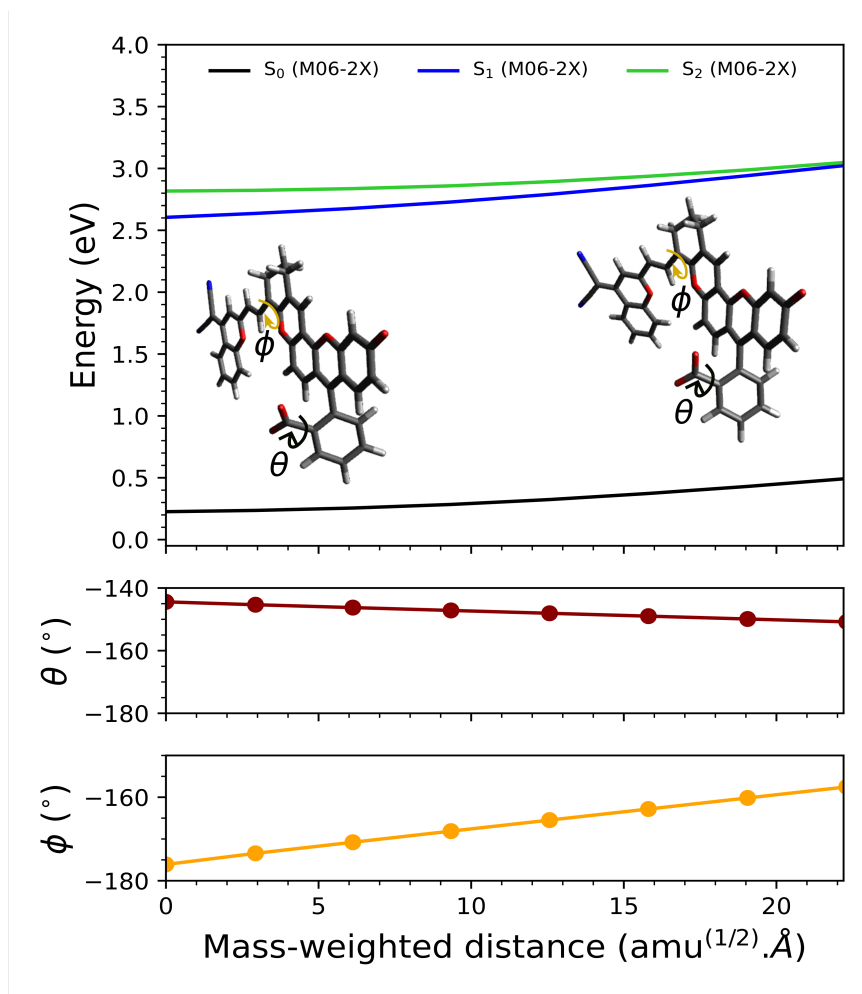

Figure S5: Relative energies (top panel) along LIIC pathways from the  $S_2$  optimised geometry to  $S_2/S_1$ -intersection region for the anionic DCM-IFC (open) with the important torsions (dihedral angles)  $\theta$  (middle panel) and  $\phi$  (bottom panel) along the same LIIC. Energies are calculated relative to the ground state energy at the same level of theory at the anionic FC geometry. Energy difference between  $S_2$  and  $S_1$  at the  $S_2$  optimised geometry is 0.22 eV. The barrier to reach the  $S_2/S_1$ -intersection region from the  $S_2$  optimised geometry is  $\leq 0.23$  eV.

## 6 Linearly interpolated pathways in internal coordinate (LIIC) between $S_2/S_1$ -intersection region and $S_1$ optimised geometry

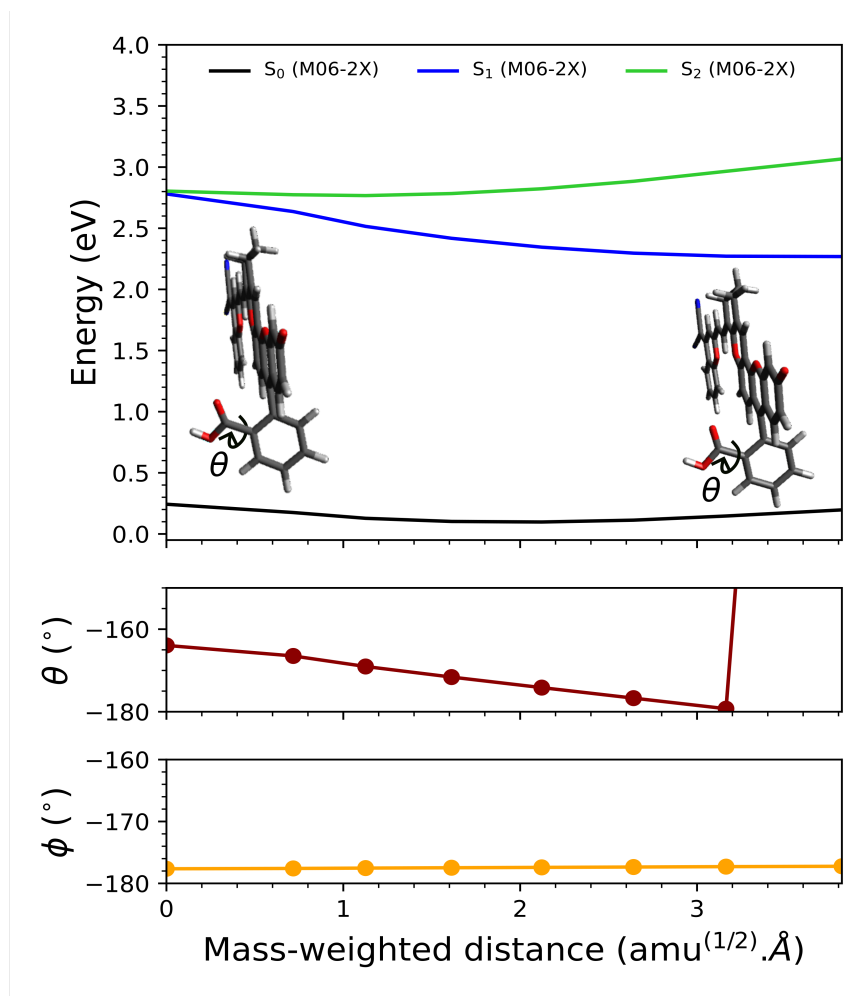

Figure S6: Relative energies (top panel) along LIIC pathways from the  $S_2/S_1$ -intersection region to  $S_1$  optimised geometry for the neutral DCM-IFC (open) with the important torsions (dihedral angles)  $\theta$  (middle panel) and  $\phi$  (bottom panel) along the same LIIC. Energies are calculated relative to the ground state energy at the same level of theory at the neutral FC geometry. Energy difference between  $S_2$  and  $S_1$  at the  $S_1$  optimised geometry is 0.80 eV. The  $\theta$  value for the last LIIC point falls on the positive side of  $180^\circ$  showing a jump in  $\theta$  between the penultimate and the last point of the LIIC. However, the difference in  $\theta$  between these two points is only  $2.6^\circ$ .

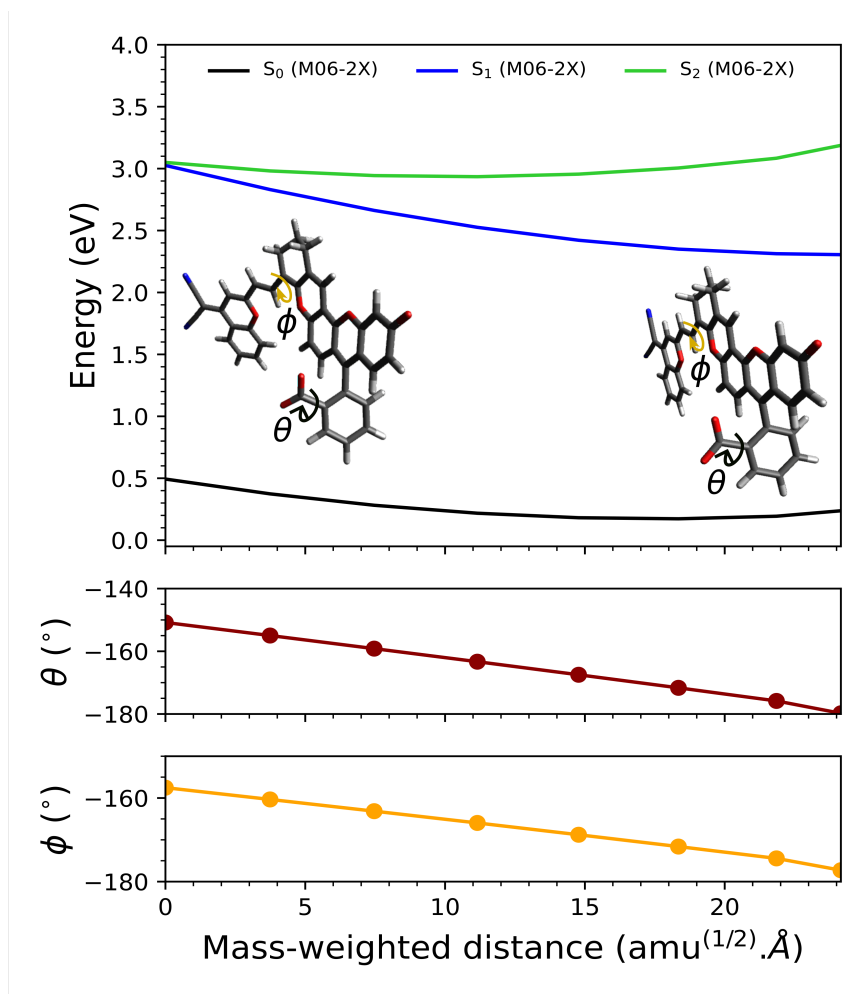

Figure S7: Relative energies (top panel) along LIIC pathways from the S<sub>2</sub>/S<sub>1</sub>-intersection region to the S<sub>1</sub> optimised geometry for the anionic DCM-IFC (open) with the important torsions (dihedral angles)  $\theta$  (middle panel) and  $\phi$  (bottom panel) along the same LIIC. Energies are calculated relative to the ground state energy at the same level of theory at the anionic FC geometry. Energy difference between S<sub>2</sub> and S<sub>1</sub> at the S<sub>1</sub> optimised geometry is 0.88 eV.

## 7 Excited state sampling via QT-AIMD

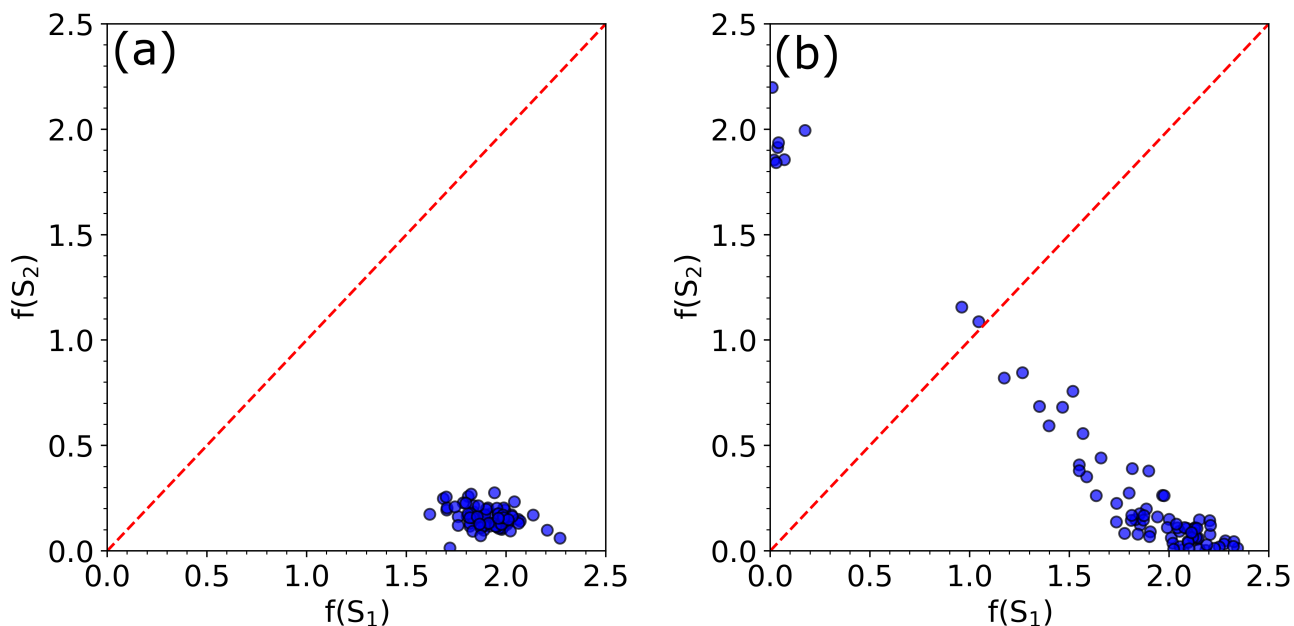

Figure S8: Scatter plot of oscillator strengths of  $S_2$  ( $f(S_2)$ ) and  $S_1$  ( $f(S_1)$ ) states at geometries sampled at the (a)  $S_1$  minimum, and (b)  $S_2$  minimum of the neutral form of DCM-IFC (open). All geometries sampled on the  $S_1$  minimum illustrate that  $S_1$  is always the brighter of the two states, whilst in 11% (9 out of 79 sampled geometries) of the sampled geometries on the  $S_2$  minimum, the  $S_2$  state is brighter representing a switching of states.

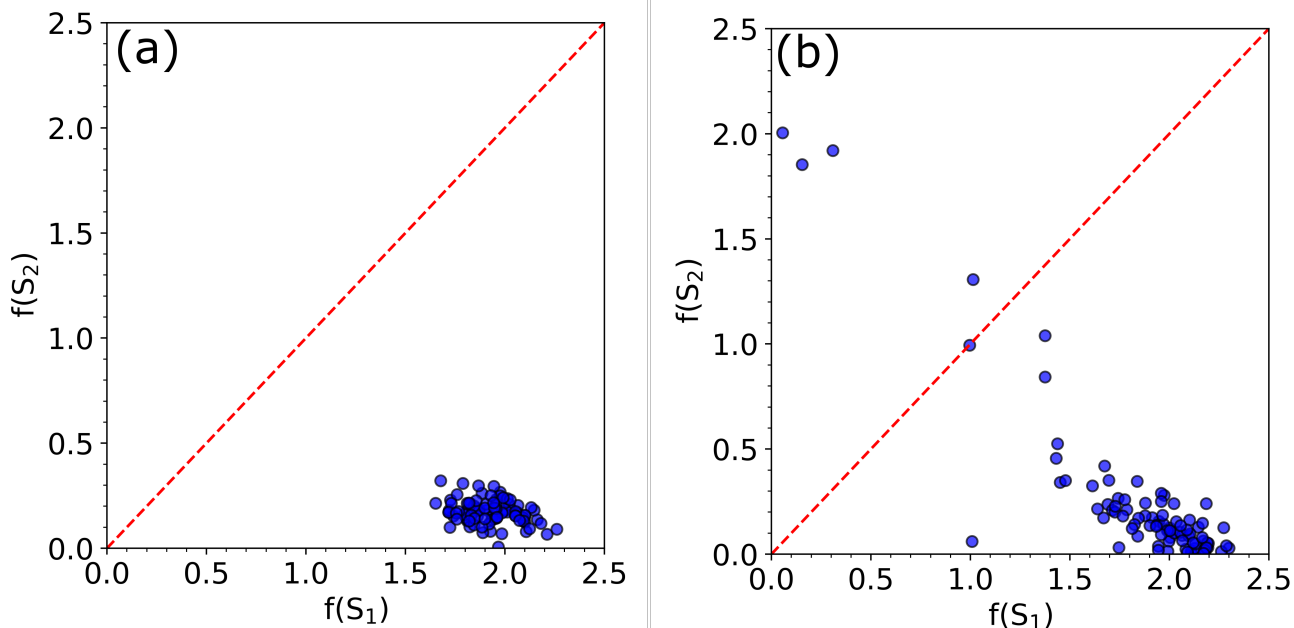

Figure S9: Scatter plot of oscillator strengths of  $S_2$  ( $f(S_2)$ ) and  $S_1$  ( $f(S_1)$ ) states at geometries sampled at the (a)  $S_1$  minimum, and (b)  $S_2$  minimum of the anion form of DCM-IFC (open). All geometries sampled on the  $S_1$  minimum illustrate that  $S_1$  is always the brighter of the two states, whilst in 5% (4 out of 87 sampled geometries) of the sampled geometries on the  $S_2$  minimum, the  $S_2$  state is brighter representing a switching of states.

## 8 Cartesian Coordinates (in Å) of S<sub>0</sub> minimum geometry of DCM-IFC (open)

Neutral (M06-2X/def2-SVP/SMD(water)):

C 0.00000000 0.00000000 0.00000000  
C -0.46032200 1.43865300 -0.04494100  
C 0.49932800 2.51018900 -0.07874000  
C 1.84657100 2.34416400 -0.01902800  
C 2.77042100 3.45008300 -0.03850600  
C 4.13111500 3.29984600 0.04457400  
C 5.02399200 4.40712800 0.03036900  
C 4.39574600 5.72540500 -0.09986000  
C 2.98978100 5.78152300 -0.17863500  
C 2.29454200 6.98758400 -0.30154200  
C 3.00324800 8.17441800 -0.35176800  
C 4.40379300 8.15710600 -0.28129600  
C 5.08322800 6.95771900 -0.15844900  
H 6.16776400 6.98360700 -0.10968800  
H 4.96539600 9.09026500 -0.32388400  
H 2.46924900 9.12044400 -0.44821500  
H 1.20626900 6.95739500 -0.35599100  
O 2.21508300 4.66644600 -0.14206300  
C 6.39952300 4.16504000 0.14001200  
C 7.44793300 5.12711400 0.16495200  
N 8.35495300 5.85074900 0.19501600  
C 6.87118600 2.82261100 0.25320800  
N 7.26176800 1.73396900 0.34467100  
H 4.51149100 2.28314300 0.13038400  
H 2.30635900 1.35804800 0.05759200  
H 0.10835700 3.52776800 -0.13890800  
C -1.80083300 1.72545500 -0.03642500  
C -2.84102600 0.71640100 0.09557000  
C -2.38567100 -0.69801400 0.32187300  
C -1.08942300 -0.97701600 -0.43037400  
H -1.26761700 -0.87331700 -1.51262900  
H -0.76085400 -2.00897500 -0.24907600  
H -3.18801700 -1.38981200 0.03297700  
H -2.20892200 -0.83516200 1.40276200  
C -4.14121000 1.08647100 0.04863300  
C -4.49629300 2.48160200 -0.10081200  
C -3.46998800 3.42746200 -0.18074400  
O -2.17770200 3.03765700 -0.14192700  
C -3.72256000 4.80157600 -0.30349500  
C -5.03026700 5.23809600 -0.35134700  
C -6.10701700 4.32634500 -0.27496500  
C -5.81619300 2.95949400 -0.15079200  
O -6.79464400 2.03284900 -0.07175800  
C -8.10839400 2.37249500 -0.10237900  
C -8.47533400 3.76948500 -0.22514100  
C -7.49377800 4.72665300 -0.30673500  
C -7.83383900 6.16292500 -0.51939200  
C -7.83994900 7.12274000 0.50986400  
C -8.15485000 8.45439700 0.21562700  
C -8.45748400 8.83914900 -1.08698200  
C -8.45196900 7.88955500 -2.10697300  
C -8.14314500 6.55998300 -1.82355300

H -8.13908000 5.81533600 -2.62150300  
H -8.69037700 8.18068900 -3.13084300  
H -8.69986400 9.87985800 -1.30389700  
H -8.16302100 9.18963800 1.01938900  
C -7.52578700 6.72076500 1.91283000  
O -7.24212200 5.59480400 2.25248600  
O -7.58814500 7.73386500 2.77348200  
H -7.38183800 7.39829800 3.66392200  
C -9.89144800 4.06901700 -0.23844200  
C -10.8180430 3.08988300 -0.15130500  
C -10.4463130 1.66973500 -0.04294100  
C -9.02755600 1.37245900 -0.01790700  
H -8.70480700 0.33496300 0.06863200  
O -11.3111630 0.78683000 0.02287000  
H -11.8856210 3.31607200 -0.15931300  
H -10.1944020 5.11448100 -0.31752900  
H -5.24262500 6.30355200 -0.44990600  
H -2.88248700 5.49274200 -0.36112400  
H -4.93312300 0.34249700 0.14268200  
H 0.87631600 -0.11241400 -0.65526600  
H 0.34556100 -0.24370000 1.01981000

**Anion (M06-2X/def2-SVP/SMD(water)):**

C 0.00000000 0.00000000 0.00000000  
C -0.46288200 1.43781400 -0.04817400  
C 0.49430400 2.51087400 -0.07441100  
C 1.84182000 2.34813900 -0.00314500  
C 2.76323600 3.45545000 -0.02116900  
C 4.12387400 3.30867900 0.07459000  
C 5.01459500 4.41717400 0.05826200  
C 4.38506800 5.73333100 -0.08666300  
C 2.97970700 5.78633800 -0.17712300  
C 2.28333800 6.99013300 -0.31483300  
C 2.99033500 8.17787300 -0.36816700  
C 4.39023500 8.16368000 -0.28550700  
C 5.07074800 6.96648600 -0.14792500  
H 6.15472900 6.99481700 -0.08942900  
H 4.95048800 9.09756500 -0.33000900  
H 2.45545600 9.12213700 -0.47630500  
H 1.19561000 6.95752300 -0.37802500  
O 2.20679500 4.67009000 -0.13854500  
C 6.39015100 4.17882400 0.17927600  
C 7.43686200 5.14272400 0.19870800  
N 8.34280400 5.86794700 0.22458200  
C 6.86350100 2.83869900 0.31010300  
N 7.25551800 1.75187200 0.41635100  
H 4.50538400 2.29333700 0.17088500  
H 2.30290000 1.36328800 0.08127000  
H 0.10174900 3.52751500 -0.14039600  
C -1.80459900 1.72194100 -0.05121900  
C -2.84331400 0.70986700 0.06609200  
C -2.38751300 -0.70448700 0.29251000  
C -1.08201700 -0.97856800 -0.44536500  
H -1.24787300 -0.87264300 -1.52937000  
H -0.75310200 -2.01021200 -0.26273000  
H -3.18499700 -1.39695600 -0.00809900

H -2.22315100 -0.84528900 1.37488800  
C -4.14396300 1.07728700 0.00646100  
C -4.50143400 2.47212100 -0.13684500  
C -3.47713100 3.42052600 -0.19934600  
O -2.18329100 3.03286600 -0.15519500  
C -3.73275100 4.79513800 -0.30836200  
C -5.04162800 5.22822200 -0.35648800  
C -6.11712300 4.31395800 -0.29840000  
C -5.82307500 2.94764200 -0.19147300  
O -6.79807800 2.01554600 -0.13084700  
C -8.11231900 2.35420100 -0.16634200  
C -8.48210100 3.74922200 -0.26881700  
C -7.50482300 4.71735900 -0.32262700  
C -7.84756900 6.15177400 -0.53800700  
C -7.79814500 7.12098300 0.47899000  
C -8.10918700 8.44644000 0.16025700  
C -8.46119000 8.81732600 -1.13514500  
C -8.51184700 7.85137700 -2.13963000  
C -8.20693200 6.52527300 -1.84014300  
H -8.24392500 5.76476300 -2.62293800  
H -8.78946600 8.12648300 -3.15823500  
H -8.69960200 9.85784000 -1.36074400  
H -8.07215800 9.18662400 0.95973000  
C -7.44002900 6.76341400 1.92569300  
O -7.21182000 5.55747700 2.16897600  
O -7.40796200 7.70274400 2.74895900  
C -9.89831500 4.04063600 -0.28499600  
C -10.8228420 3.05602100 -0.22112600  
C -10.4473690 1.63713700 -0.13496400  
C -9.02865400 1.34746200 -0.10548000  
H -8.70039500 0.31051800 -0.03354400  
O -11.3098720 0.74789000 -0.08920500  
H -11.8910590 3.27947600 -0.23059400  
H -10.2055580 5.08595300 -0.34518200  
H -5.25735000 6.29414800 -0.43905500  
H -2.89429800 5.48933400 -0.35218100  
H -4.93470800 0.33061600 0.08864800  
H 0.88472400 -0.10968100 -0.64433700  
H 0.33317500 -0.24502700 1.02363600

## 9 Cartesian Coordinates (in Å) of S<sub>2</sub> minimum geometry of DCM-IFC (open)

Neutral (TD-M06-2X/def2-SVP/SMD(water)):

C 0.00000000 0.00000000 0.00000000  
C -0.42994800 1.43727400 -0.08180400  
C 0.51506900 2.51118400 -0.11393700  
C 1.86176200 2.33347600 -0.03296500  
C 2.79380600 3.43625600 -0.04705600  
C 4.14532700 3.26365700 0.05067000  
C 5.05523500 4.36726000 0.03854900  
C 4.43977500 5.68871500 -0.10251000  
C 3.03428100 5.75991400 -0.19575800  
C 2.35397900 6.97299200 -0.33025100

C 3.07671700 8.15112300 -0.37712100  
C 4.47663200 8.11903700 -0.29143700  
C 5.14169600 6.91347800 -0.15739900  
H 6.22585000 6.92778800 -0.09655000  
H 5.04845000 9.04603300 -0.33075800  
H 2.55445200 9.10268300 -0.48254100  
H 1.26612500 6.95471300 -0.39593900  
O 2.24610200 4.65379700 -0.16248700  
C 6.41947800 4.10249000 0.15992000  
C 7.48267600 5.05128700 0.18576200  
N 8.39913000 5.76138200 0.21713200  
C 6.87444700 2.75298800 0.28357900  
N 7.25483100 1.66239100 0.38342400  
H 4.51184400 2.24231000 0.14348100  
H 2.31351300 1.34465700 0.05675000  
H 0.12551500 3.52709700 -0.18665700  
C -1.79668600 1.73306400 -0.09121400  
C -2.81552600 0.74282100 0.03595400  
C -2.39987500 -0.68986600 0.21141900  
C -1.07565000 -0.96445300 -0.48864200  
H -1.20462400 -0.84645600 -1.57590600  
H -0.75596600 -1.99767800 -0.30319000  
H -3.20076700 -1.34427400 -0.15702300  
H -2.29132400 -0.88914000 1.29185400  
C -4.13487200 1.14265100 0.02472300  
C -4.46868800 2.51531300 -0.10245700  
C -3.40375200 3.46151100 -0.22046700  
O -2.12865300 3.03539300 -0.20819800  
C -3.65030700 4.82901500 -0.35642800  
C -4.95441200 5.27549400 -0.36520400  
C -6.07577700 4.38146900 -0.23485500  
C -5.78636100 3.00180700 -0.11921300  
O -6.75807400 2.07594900 -0.02598400  
C -8.08587000 2.42572200 -0.00679600  
C -8.45001200 3.79953700 -0.10136500  
C -7.43460700 4.79160000 -0.22974100  
C -7.80183600 6.21617100 -0.41650900  
C -7.40826800 7.24796800 0.46298000  
C -7.73073700 8.58043600 0.17874800  
C -8.46436800 8.90574500 -0.95770900  
C -8.87092200 7.89274600 -1.82584600  
C -8.53859500 6.56725600 -1.55771300  
H -8.84018000 5.77987300 -2.25095200  
H -9.44212600 8.13482900 -2.72330200  
H -8.71777000 9.94608300 -1.16390200  
H -7.41571500 9.36280900 0.86895300  
C -6.68693500 6.93850300 1.73453800  
O -6.74538400 5.88450900 2.32426500  
O -5.96316800 7.96618200 2.17947600  
H -5.55452800 7.71339700 3.02681800  
C -9.84785200 4.07125800 -0.02784300  
C -10.7775610 3.06992600 0.09030400  
C -10.4089500 1.66690600 0.15175400  
C -8.99441600 1.40165200 0.10924700  
H -8.64148000 0.37151900 0.17204400  
O -11.2703160 0.75357300 0.24296900

H -11.8423010 3.30581800 0.14597600  
H -10.1795860 5.11002800 -0.06006300  
H -5.14386600 6.34202900 -0.48884000  
H -2.81027500 5.51595000 -0.45701100  
H -4.92865400 0.40043700 0.11890300  
H 0.92525800 -0.13556500 -0.57598700  
H 0.25351500 -0.21965400 1.05299400

**Anion (TD-M06-2X/def2-SVP/SMD(water)):**

C 0.00000000 0.00000000 0.00000000  
C -0.44849300 1.43326300 -0.07008900  
C 0.48735100 2.51720600 -0.07342000  
C 1.83404600 2.35193500 0.02582200  
C 2.75501600 3.46327200 0.05291900  
C 4.10662900 3.30309100 0.17709400  
C 5.00410400 4.41480800 0.21418200  
C 4.37799400 5.73333600 0.09357500  
C 2.97461700 5.79233700 -0.03285400  
C 2.28455700 7.00153200 -0.15217300  
C 2.99505900 8.18806400 -0.14892700  
C 4.39250000 8.16827000 -0.02758800  
C 5.06725800 6.96638800 0.09076000  
H 6.14922100 6.99027900 0.18071900  
H 4.95482100 9.10189000 -0.02649700  
H 2.46495800 9.13658500 -0.24186600  
H 1.19892800 6.97377000 -0.24564400  
O 2.19793700 4.67787300 -0.04735100  
C 6.36901000 4.16185600 0.36100600  
C 7.42080100 5.12036000 0.43402900  
N 8.32878000 5.83886400 0.50304000  
C 6.83519100 2.81475900 0.46302000  
N 7.22432000 1.72568200 0.54591100  
H 4.48168300 2.28357200 0.25431100  
H 2.29411800 1.36596200 0.10350100  
H 0.08854800 3.53045900 -0.13439300  
C -1.81488000 1.71233000 -0.09432000  
C -2.82728900 0.70878500 0.01863900  
C -2.39268700 -0.71852800 0.19609100  
C -1.06201800 -0.97393200 -0.49951100  
H -1.18759800 -0.85078100 -1.58667900  
H -0.73150700 -2.00478700 -0.31927000  
H -3.18284600 -1.38435600 -0.17516900  
H -2.28384100 -0.91678000 1.27660500  
C -4.14765300 1.09188100 -0.00361800  
C -4.49834000 2.46428400 -0.12987100  
C -3.44401900 3.42107300 -0.23638000  
O -2.16455000 3.01225700 -0.20980500  
C -3.70477700 4.78756500 -0.37803800  
C -5.01174500 5.21986800 -0.40318500  
C -6.12644300 4.31236800 -0.28223400  
C -5.81865400 2.93528200 -0.15900900  
O -6.78059700 1.99544500 -0.07580900  
C -8.11107400 2.33224900 -0.06250500  
C -8.49153000 3.70003800 -0.16936700  
C -7.48814100 4.70903900 -0.30481700  
C -7.87431600 6.12378700 -0.52404700

C -7.46236400 7.17582800 0.31917700  
C -7.81995700 8.48985600 -0.00181600  
C -8.60246100 8.77756100 -1.11710500  
C -9.01849000 7.73824000 -1.95031300  
C -8.64969500 6.42855100 -1.65686200  
H -8.95491300 5.61740500 -2.32148600  
H -9.62147300 7.94717200 -2.83538400  
H -8.88244200 9.80854200 -1.33918500  
H -7.47731400 9.29344300 0.65194300  
C -6.64180200 6.94471300 1.59079600  
O -6.89076200 5.91782800 2.25846900  
O -5.79173500 7.82212600 1.86516600  
C -9.89331600 3.95489300 -0.09853700  
C -10.8126360 2.94439800 0.02473800  
C -10.4269610 1.54666200 0.09499000  
C -9.00809800 1.29798500 0.05797700  
H -8.64354200 0.27238500 0.12909100  
O -11.2759950 0.62264100 0.18975000  
H -11.8800440 3.16840200 0.07862900  
H -10.2361420 4.98960400 -0.13586300  
H -5.21091100 6.28402700 -0.52437800  
H -2.87054700 5.48297400 -0.46895000  
H -4.93389600 0.34070400 0.08190300  
H 0.92694800 -0.11713500 -0.57779700  
H 0.25766700 -0.22808300 1.05003600

## 10 Cartesian Coordinates (in Å) of S<sub>1</sub> minimum geometry of DCM-IFC (open)

Neutral (TD-M06-2X/def2-SVP/SMD(water)):

C 0.00000000 0.00000000 0.00000000  
C -0.43364800 1.43939300 -0.11356200  
C 0.46599700 2.50355800 -0.14966700  
C 1.86269300 2.35839600 -0.06788300  
C 2.75431900 3.43341000 -0.09059400  
C 4.14428800 3.28931600 0.00706700  
C 5.03068000 4.37130300 -0.01286400  
C 4.41779000 5.70070200 -0.15823300  
C 3.01030300 5.77790900 -0.25022400  
C 2.34308000 6.99467100 -0.38922300  
C 3.07076700 8.17585100 -0.44266700  
C 4.46504500 8.13537500 -0.35851700  
C 5.12170400 6.91885600 -0.21961400  
H 6.20614200 6.92537200 -0.15989700  
H 5.04598200 9.05683000 -0.40191300  
H 2.55035500 9.12817000 -0.55169900  
H 1.25474900 6.98405600 -0.45388500  
O 2.21064000 4.67692300 -0.21116800  
C 6.43151100 4.12087600 0.10502700  
C 7.48081200 5.07086400 0.13389600  
N 8.39387500 5.79268200 0.16705400  
C 6.89061400 2.78206900 0.22259900  
N 7.26446300 1.68456600 0.31782100  
H 4.51634000 2.26924300 0.10647800

H 2.31901900 1.37263400 0.03260300  
H 0.06613500 3.51504200 -0.22567600  
C -1.83906300 1.69190400 -0.14407800  
C -2.82778600 0.69913300 -0.03418100  
C -2.39580100 -0.73273400 0.12238000  
C -1.04515200 -0.97233800 -0.53946500  
H -1.14296800 -0.83956100 -1.62848300  
H -0.71633500 -2.00437000 -0.36138100  
H -3.17438200 -1.38842800 -0.28971700  
H -2.32404600 -0.95574300 1.20059600  
C -4.16395600 1.07211900 -0.05739500  
C -4.50968500 2.44198400 -0.18365900  
C -3.47490000 3.39747600 -0.29126500  
O -2.19670700 2.99841700 -0.26972400  
C -3.72746900 4.77083100 -0.42320200  
C -5.03496500 5.20478600 -0.45017100  
C -6.11795000 4.29439100 -0.34599100  
C -5.83794200 2.93227400 -0.21534400  
O -6.81265300 2.00943300 -0.11410700  
C -8.12672700 2.35400700 -0.13128000  
C -8.48705300 3.75360300 -0.26007700  
C -7.50278400 4.70591300 -0.36220000  
C -7.83785300 6.14206700 -0.58276300  
C -7.82110900 7.11149900 0.43752500  
C -8.13629400 8.44147100 0.13657000  
C -8.46108900 8.81525100 -1.16397700  
C -8.47858000 7.85620800 -2.17485600  
C -8.17032300 6.52794300 -1.88459500  
H -8.18508200 5.77557200 -2.67513400  
H -8.73478500 8.13874400 -3.19682600  
H -8.70283700 9.85497500 -1.38623800  
H -8.12635900 9.18431900 0.93330400  
C -7.48061000 6.72174500 1.83783900  
O -7.17555200 5.60153700 2.17855000  
O -7.54431900 7.73811900 2.69397000  
H -7.31713600 7.41089300 3.58245200  
C -9.90188200 4.06033700 -0.25867800  
C -10.8319730 3.08649400 -0.15389700  
C -10.4663360 1.66465200 -0.03990900  
C -9.04805700 1.35948200 -0.02859800  
H -8.72958700 0.32100500 0.06147600  
O -11.3339810 0.78734200 0.04134100  
H -11.8984140 3.31801300 -0.15091600  
H -10.2004580 5.10667700 -0.34151200  
H -5.24866100 6.26956600 -0.55405200  
H -2.88755000 5.45975100 -0.50239200  
H -4.94754000 0.31758200 0.02082200  
H 0.95379800 -0.13944900 -0.52545700  
H 0.19264300 -0.22086900 1.06506400

**Anion (TD-M06-2X/def2-SVP/SMD(water)):**

C 0.00000000 0.00000000 0.00000000  
C -0.43728600 1.43802500 -0.11655700  
C 0.45939500 2.50540800 -0.14608100  
C 1.85561400 2.36544100 -0.05183200  
C 2.74495500 3.44250400 -0.08126400

C 4.13440000 3.30335400 0.02801100  
C 5.01865600 4.38681700 -0.00485200  
C 4.40354700 5.71231300 -0.17375900  
C 2.99642300 5.78485300 -0.27575700  
C 2.32740900 6.99778100 -0.43767400  
C 3.05271900 8.17980600 -0.50399300  
C 4.44639200 8.14404000 -0.40870900  
C 5.10486100 6.93132400 -0.24688600  
H 6.18870800 6.94157200 -0.17795700  
H 5.02541600 9.06624400 -0.46100400  
H 2.53083600 9.12907600 -0.63112700  
H 1.23956100 6.98359600 -0.50942100  
O 2.19903700 4.68279100 -0.22452600  
C 6.41968000 4.14142300 0.12278200  
C 7.46838400 5.09245400 0.12350200  
N 8.38135400 5.81513800 0.13401100  
C 6.88031200 2.80677600 0.27579600  
N 7.25545300 1.71272800 0.40132400  
H 4.50819500 2.28572200 0.14458700  
H 2.31406900 1.38222200 0.06306300  
H 0.05673900 3.51516200 -0.22995700  
C -1.84307800 1.68541300 -0.16066800  
C -2.82913200 0.68757600 -0.07493100  
C -2.39418400 -0.74399300 0.07694700  
C -1.03134900 -0.97391500 -0.56284800  
H -1.11073800 -0.83536000 -1.65264200  
H -0.70106500 -2.00552100 -0.38480600  
H -3.16303900 -1.39937700 -0.35355900  
H -2.34031000 -0.97527100 1.15448900  
C -4.16653900 1.05506100 -0.11628600  
C -4.51671300 2.42465900 -0.23002900  
C -3.48477800 3.38599200 -0.30639900  
O -2.20442000 2.99205400 -0.27608500  
C -3.74311500 4.76015700 -0.41379400  
C -5.05268900 5.18779700 -0.44605000  
C -6.13313500 4.27143500 -0.37697400  
C -5.84744500 2.90954200 -0.27324900  
O -6.81743700 1.97805100 -0.20638500  
C -8.13260500 2.31854700 -0.23552800  
C -8.49834200 3.71622000 -0.33688300  
C -7.51985500 4.68257400 -0.39574100  
C -7.85827000 6.11737000 -0.61322400  
C -7.78121800 7.09209600 0.39691900  
C -8.08957000 8.41777200 0.07695900  
C -8.46527800 8.78350900 -1.21329600  
C -8.54391300 7.81215200 -2.21073900  
C -8.24251400 6.48559500 -1.90982600  
H -8.30126600 5.72075600 -2.68701400  
H -8.84042400 8.08347300 -3.22500800  
H -8.70068000 9.82440500 -1.44026300  
H -8.03135400 9.16226700 0.87113500  
C -7.39717400 6.73963800 1.83812300  
O -7.16120200 5.53467700 2.08035900  
O -7.35369500 7.68091400 2.65816100  
C -9.91418800 4.01130300 -0.34651900  
C -10.8404930 3.02897500 -0.27836700

C -10.4683860 1.60853300 -0.19391800  
C -9.04949100 1.31436700 -0.17022000  
H -8.72365300 0.27661600 -0.09963900  
O -11.3321820 0.72229600 -0.14457700  
H -11.9081680 3.25505500 -0.28240700  
H -10.2190240 5.05733200 -0.40462400  
H -5.27135800 6.25335300 -0.52648600  
H -2.90591900 5.45488600 -0.46763400  
H -4.94754200 0.29598500 -0.05881300  
H 0.96399000 -0.13428900 -0.50771300  
H 0.17271600 -0.22440400 1.06778100

## 11 Cartesian Coordinates (in Å) of S<sub>2</sub>/S<sub>1</sub>-intersection region (conical intersection not converged) of DCM-IFC (open)

Neutral (TDA-CAM-B3LYP/6-31G(d)/CPCM(water)):

C -0.055444 -0.002764 0.054923  
C -0.488129 1.428802 -0.055680  
C 0.473628 2.518003 -0.078282  
C 1.793389 2.343803 0.015449  
C 2.747644 3.466685 -0.005775  
C 4.074172 3.291311 0.090931  
C 4.993330 4.412306 0.063175  
C 4.366347 5.719301 -0.099739  
C 2.965026 5.777903 -0.188187  
C 2.270210 6.977028 -0.340252  
C 2.980026 8.154517 -0.412504  
C 4.380149 8.138140 -0.334493  
C 5.055766 6.948793 -0.181621  
H 6.133445 6.972725 -0.127636  
H 4.937383 9.066098 -0.394813  
H 2.452538 9.094809 -0.531492  
H 1.188329 6.948889 -0.399974  
O 2.181508 4.667136 -0.134496  
C 6.335490 4.145852 0.191933  
C 7.397395 5.099607 0.207950  
N 8.307013 5.814961 0.232333  
C 6.795185 2.797746 0.338984  
N 7.187874 1.715585 0.457386  
H 4.451797 2.283037 0.193617  
H 2.251640 1.366502 0.111138  
H 0.075714 3.521234 -0.166149  
C -1.839978 1.734234 -0.108798  
C -2.855467 0.739086 -0.033482  
C -2.461638 -0.698838 0.141044  
C -1.099795 -0.976747 -0.485344  
H -1.166312 -0.871576 -1.573727  
H -0.787585 -2.001690 -0.272221  
H -3.237241 -1.340394 -0.285715  
H -2.422174 -0.923670 1.216661  
C -4.176971 1.140103 -0.099235  
C -4.516958 2.494077 -0.221116  
C -3.448407 3.463893 -0.271887  
O -2.152243 3.035239 -0.224516

C -3.723815 4.804452 -0.376267  
C -5.047620 5.226338 -0.424123  
C -6.164036 4.328227 -0.375981  
C -5.845048 2.950603 -0.287026  
O -6.787626 2.001783 -0.262183  
C -8.140763 2.314637 -0.312360  
C -8.526703 3.665596 -0.396833  
C -7.523597 4.692740 -0.427229  
C -7.919396 6.115191 -0.578471  
C -7.718179 7.096289 0.413463  
C -8.059775 8.430097 0.168327  
C -8.625777 8.808744 -1.040559  
C -8.841370 7.847742 -2.022734  
C -8.484288 6.524815 -1.791315  
H -8.635427 5.782467 -2.568446  
H -9.279136 8.128556 -2.975744  
H -8.896329 9.845214 -1.213166  
H -7.893260 9.168779 0.943430  
C -7.190662 6.738034 1.760044  
O -7.309093 5.661354 2.305431  
O -6.565536 7.767948 2.356062  
H -6.298823 7.468855 3.246019  
C -9.923049 3.876173 -0.413898  
C -10.823500 2.835286 -0.373428  
C -10.427290 1.451392 -0.306448  
C -9.010927 1.250039 -0.270057  
H -8.617462 0.240351 -0.206341  
O -11.269050 0.500014 -0.273839  
H -11.890286 3.043231 -0.389175  
H -10.292850 4.895651 -0.459679  
H -5.248134 6.287492 -0.511793  
H -2.911332 5.521800 -0.420165  
H -4.961265 0.392946 -0.051804  
H 0.895485 -0.142358 -0.463654  
H 0.136797 -0.210876 1.117792

**Anion (TDA-CAM-B3LYP/6-31G(d)/CPCM(water)):**

C -0.076086 -0.323959 -0.238855  
C -0.437532 1.082289 -0.587214  
C 0.512945 2.184598 -0.576699  
C 1.604526 2.237947 0.186544  
C 2.440115 3.461559 0.204195  
C 3.453402 3.678622 1.051503  
C 4.187172 4.931818 1.042552  
C 3.869249 5.827334 -0.069865  
C 2.787058 5.491801 -0.898552  
C 2.366046 6.295178 -1.958496  
C 3.067950 7.447439 -2.236195  
C 4.177148 7.801619 -1.452936  
C 4.560874 7.017600 -0.386961  
H 5.421280 7.319290 0.194047  
H 4.734823 8.703126 -1.681607  
H 2.764955 8.077560 -3.065971  
H 1.506164 5.978456 -2.541334  
O 2.064244 4.353869 -0.721597  
C 5.063798 5.175615 2.073699

C 5.812896 6.372370 2.287334  
N 6.435843 7.319872 2.516115  
C 5.266058 4.192051 3.092685  
N 5.447712 3.424192 3.939321  
H 3.676586 2.924451 1.795547  
H 1.896726 1.450218 0.873087  
H 0.210886 3.076399 -1.112324  
C -1.758090 1.420135 -0.840589  
C -2.824576 0.482110 -0.694381  
C -2.495453 -0.942065 -0.371813  
C -1.086698 -1.329128 -0.812715  
H -1.017004 -1.343901 -1.905791  
H -0.847317 -2.331523 -0.454213  
H -3.264417 -1.591549 -0.799441  
H -2.551460 -1.065055 0.719558  
C -4.124461 0.958087 -0.752465  
C -4.385475 2.329721 -0.843906  
C -3.243274 3.227558 -0.985918  
O -1.997632 2.706793 -1.095402  
C -3.419460 4.585636 -1.001637  
C -4.694323 5.099302 -0.787793  
C -5.860518 4.286104 -0.561030  
C -5.661281 2.885817 -0.679497  
O -6.670401 2.015681 -0.579272  
C -7.965461 2.428016 -0.239842  
C -8.198453 3.797879 -0.017434  
C -7.137503 4.754744 -0.214083  
C -7.405409 6.213135 -0.092868  
C -6.762109 7.037322 0.848761  
C -7.011183 8.412946 0.830216  
C -7.911590 8.982725 -0.061310  
C -8.561647 8.167959 -0.984354  
C -8.294169 6.803872 -1.000802  
H -8.781182 6.169988 -1.736538  
H -9.262664 8.592032 -1.697714  
H -8.099443 10.052612 -0.040460  
H -6.479510 9.031896 1.545442  
C -5.815093 6.506256 1.929665  
O -6.077560 5.374616 2.398501  
O -4.759387 7.167398 2.109057  
C -9.497226 4.094962 0.429278  
C -10.462945 3.115987 0.592408  
C -10.238269 1.722932 0.311141  
C -8.907643 1.432087 -0.109995  
H -8.623212 0.402596 -0.305977  
O -11.150808 0.834430 0.431654  
H -11.454691 3.393177 0.943528  
H -9.742267 5.129803 0.654536  
H -4.816806 6.175000 -0.747715  
H -2.563232 5.240420 -1.143244  
H -4.949888 0.262928 -0.635833  
H 0.936126 -0.531449 -0.592754  
H -0.046205 -0.408082 0.856798

## 12 Frequencies ( $\text{cm}^{-1}$ ) and IR intensities (km/mol) of normal modes of DCM-IFC (open) at M06-2X/def2-SVP/SMD(water)

| Frequency ( $\text{cm}^{-1}$ ) | IR intensity (km/mol) | Frequency ( $\text{cm}^{-1}$ ) | IR intensity (km/mol) | Frequency ( $\text{cm}^{-1}$ ) | IR intensity (km/mol) |
|--------------------------------|-----------------------|--------------------------------|-----------------------|--------------------------------|-----------------------|
| 12.78                          | 5.12                  | 14.53                          | 0.55                  | 16.95                          | 1.91                  |
| 19.42                          | 2.25                  | 29.76                          | 0.88                  | 34.03                          | 0.12                  |
| 42.28                          | 6.50                  | 42.46                          | 2.95                  | 55.65                          | 1.93                  |
| 62.82                          | 2.00                  | 66.17                          | 1.79                  | 78.59                          | 0.63                  |
| 79.83                          | 4.36                  | 90.24                          | 3.39                  | 96.47                          | 3.97                  |
| 105.04                         | 0.12                  | 125.43                         | 0.27                  | 139.96                         | 7.73                  |
| 144.36                         | 5.51                  | 156.70                         | 12.12                 | 165.05                         | 1.69                  |
| 171.10                         | 3.60                  | 173.37                         | 0.84                  | 179.91                         | 0.75                  |
| 187.82                         | 1.16                  | 210.28                         | 8.16                  | 225.08                         | 3.44                  |
| 247.64                         | 3.02                  | 254.79                         | 0.68                  | 257.78                         | 1.42                  |
| 262.82                         | 4.91                  | 268.39                         | 0.03                  | 285.51                         | 5.72                  |
| 296.64                         | 0.14                  | 300.98                         | 2.51                  | 312.05                         | 0.29                  |
| 327.51                         | 2.09                  | 356.87                         | 1.25                  | 369.55                         | 4.76                  |
| 377.00                         | 3.38                  | 387.38                         | 61.86                 | 405.29                         | 10.67                 |
| 410.01                         | 5.96                  | 418.29                         | 43.23                 | 428.14                         | 8.39                  |
| 441.56                         | 6.87                  | 455.54                         | 2.24                  | 464.77                         | 23.69                 |
| 475.77                         | 10.51                 | 478.51                         | 58.10                 | 486.65                         | 3.83                  |
| 500.12                         | 2.69                  | 513.84                         | 24.70                 | 516.33                         | 22.38                 |
| 519.83                         | 20.32                 | 523.29                         | 14.09                 | 534.68                         | 1.69                  |
| 540.41                         | 7.89                  | 556.57                         | 18.17                 | 571.73                         | 40.78                 |
| 575.03                         | 136.50                | 584.52                         | 59.18                 | 596.95                         | 45.29                 |
| 602.29                         | 28.92                 | 607.66                         | 5.01                  | 622.33                         | 43.35                 |
| 640.91                         | 39.44                 | 643.57                         | 139.91                | 650.50                         | 33.82                 |
| 654.06                         | 33.93                 | 660.67                         | 23.29                 | 664.50                         | 16.59                 |
| 680.69                         | 17.39                 | 690.58                         | 13.66                 | 700.00                         | 15.99                 |
| 712.27                         | 18.81                 | 721.48                         | 14.64                 | 729.97                         | 226.23                |
| 733.32                         | 1.15                  | 745.94                         | 27.35                 | 760.12                         | 3.18                  |
| 769.30                         | 43.33                 | 779.63                         | 0.23                  | 782.64                         | 74.40                 |
| 786.33                         | 80.49                 | 795.68                         | 5.71                  | 801.36                         | 25.61                 |
| 810.18                         | 42.29                 | 811.28                         | 27.91                 | 831.94                         | 0.44                  |
| 841.25                         | 12.47                 | 843.74                         | 97.29                 | 848.15                         | 34.29                 |
| 854.46                         | 27.02                 | 868.66                         | 7.61                  | 875.16                         | 128.56                |
| 880.43                         | 7.02                  | 905.85                         | 1.63                  | 907.93                         | 31.19                 |
| 915.91                         | 74.64                 | 918.74                         | 24.50                 | 934.73                         | 65.57                 |
| 936.64                         | 28.96                 | 938.82                         | 32.64                 | 941.95                         | 1.51                  |
| 946.29                         | 41.09                 | 985.58                         | 76.77                 | 1001.85                        | 0.10                  |
| 1007.34                        | 1.20                  | 1011.35                        | 45.12                 | 1013.51                        | 22.15                 |
| 1023.73                        | 423.65                | 1027.05                        | 0.64                  | 1045.83                        | 5.09                  |
| 1048.49                        | 0.24                  | 1055.22                        | 0.03                  | 1073.25                        | 73.40                 |
| 1074.13                        | 14.46                 | 1078.80                        | 9.22                  | 1085.06                        | 109.94                |
| 1097.75                        | 229.28                | 1111.57                        | 60.36                 | 1128.25                        | 214.21                |
| 1134.17                        | 7.75                  | 1151.21                        | 2480.15               | 1156.74                        | 274.76                |
| 1157.42                        | 8.01                  | 1160.22                        | 27.70                 | 1161.76                        | 185.84                |
| 1180.75                        | 637.45                | 1185.33                        | 15.86                 | 1200.40                        | 1055.06               |
| 1206.81                        | 627.10                | 1213.79                        | 440.56                | 1227.32                        | 200.95                |
| 1228.24                        | 512.14                | 1238.93                        | 117.04                | 1244.60                        | 227.41                |
| 1260.95                        | 33.50                 | 1262.49                        | 533.75                | 1263.28                        | 47.96                 |
| 1269.84                        | 937.55                | 1283.83                        | 233.47                | 1291.58                        | 165.47                |
| 1299.63                        | 66.00                 | 1315.05                        | 91.51                 | 1319.62                        | 1353.14               |
| 1335.98                        | 876.67                | 1343.13                        | 29.16                 | 1351.07                        | 34.49                 |
| 1359.70                        | 13.64                 | 1367.58                        | 233.71                | 1371.41                        | 16.77                 |
| 1385.07                        | 40.16                 | 1387.98                        | 117.27                | 1400.60                        | 327.04                |
| 1404.51                        | 499.27                | 1416.08                        | 118.44                | 1422.97                        | 21.40                 |
| 1425.88                        | 37.53                 | 1430.13                        | 50.02                 | 1448.57                        | 802.10                |
| 1448.94                        | 1325.91               | 1452.97                        | 63.99                 | 1469.71                        | 407.32                |
| 1484.62                        | 108.67                | 1495.23                        | 2130.09               | 1520.43                        | 1242.23               |
| 1526.03                        | 2715.91               | 1533.00                        | 236.91                | 1545.35                        | 2608.43               |
| 1549.77                        | 57.63                 | 1587.92                        | 6738.37               | 1613.31                        | 166.17                |
| 1636.58                        | 401.79                | 1648.78                        | 400.28                | 1662.86                        | 213.07                |
| 1666.41                        | 95.13                 | 1671.15                        | 282.86                | 1677.01                        | 1334.56               |
| 1689.72                        | 48.56                 | 1691.64                        | 488.28                | 1704.22                        | 256.12                |
| 1711.83                        | 858.95                | 1729.54                        | 111.41                | 1731.35                        | 354.70                |
| 1824.56                        | 834.98                | 2347.09                        | 311.80                | 2363.32                        | 931.99                |
| 3051.27                        | 39.49                 | 3057.68                        | 16.96                 | 3075.89                        | 42.80                 |
| 3115.88                        | 32.70                 | 3142.70                        | 45.72                 | 3144.22                        | 19.23                 |
| 3223.89                        | 0.07                  | 3224.45                        | 0.03                  | 3227.76                        | 5.36                  |
| 3234.40                        | 1.81                  | 3234.93                        | 0.64                  | 3235.63                        | 28.30                 |
| 3237.96                        | 7.54                  | 3238.44                        | 2.55                  | 3240.86                        | 29.68                 |
| 3244.00                        | 1.17                  | 3244.70                        | 2.63                  | 3244.74                        | 1.43                  |
| 3250.86                        | 1.24                  | 3255.68                        | 3.00                  | 3258.85                        | 1.43                  |
| 3259.82                        | 7.89                  | 3296.40                        | 7.13                  | 3762.87                        | 328.20                |

Table S3: Vibrational frequencies and IR intensities for ground state neutral DCM-IFC (open).

| Frequency (cm <sup>-1</sup> ) | IR intensity (km/mol) | Frequency (cm <sup>-1</sup> ) | IR intensity (km/mol) | Frequency (cm <sup>-1</sup> ) | IR intensity (km/mol) |
|-------------------------------|-----------------------|-------------------------------|-----------------------|-------------------------------|-----------------------|
| 13.70                         | 7.23                  | 15.25                         | 2.82                  | 18.31                         | 3.54                  |
| 25.47                         | 17.13                 | 30.64                         | 1.25                  | 35.33                         | 2.79                  |
| 42.26                         | 2.19                  | 47.81                         | 5.05                  | 62.02                         | 4.38                  |
| 63.04                         | 1.19                  | 76.21                         | 0.38                  | 79.19                         | 0.09                  |
| 86.65                         | 4.55                  | 90.13                         | 3.11                  | 97.13                         | 6.70                  |
| 106.36                        | 1.39                  | 129.54                        | 9.66                  | 143.23                        | 2.59                  |
| 145.84                        | 27.81                 | 156.98                        | 13.33                 | 164.39                        | 1.52                  |
| 170.92                        | 3.83                  | 173.77                        | 0.88                  | 179.85                        | 4.51                  |
| 187.72                        | 1.43                  | 210.27                        | 12.82                 | 225.64                        | 10.40                 |
| 246.37                        | 19.08                 | 256.06                        | 0.54                  | 259.57                        | 5.08                  |
| 262.99                        | 5.86                  | 269.01                        | 0.40                  | 286.50                        | 2.30                  |
| 296.69                        | 2.93                  | 302.50                        | 2.64                  | 311.83                        | 0.43                  |
| 330.40                        | 2.81                  | 356.66                        | 0.99                  | 369.54                        | 5.78                  |
| 377.28                        | 5.33                  | 387.23                        | 63.74                 | 402.16                        | 16.50                 |
| 408.50                        | 4.89                  | 418.31                        | 43.84                 | 441.15                        | 3.90                  |
| 441.82                        | 6.30                  | 456.34                        | 3.59                  | 464.52                        | 18.89                 |
| 476.70                        | 8.60                  | 479.81                        | 48.52                 | 486.76                        | 5.07                  |
| 500.28                        | 2.48                  | 516.28                        | 29.34                 | 517.92                        | 30.99                 |
| 523.32                        | 17.22                 | 524.90                        | 10.23                 | 534.41                        | 1.78                  |
| 540.49                        | 9.43                  | 558.62                        | 8.00                  | 572.17                        | 48.05                 |
| 585.24                        | 39.06                 | 597.64                        | 73.84                 | 602.29                        | 28.23                 |
| 607.63                        | 5.24                  | 622.87                        | 50.01                 | 641.90                        | 21.90                 |
| 644.00                        | 150.03                | 652.05                        | 24.35                 | 657.85                        | 7.63                  |
| 664.60                        | 2.85                  | 676.20                        | 34.83                 | 688.66                        | 3.63                  |
| 694.35                        | 25.39                 | 698.76                        | 16.15                 | 712.05                        | 18.84                 |
| 723.22                        | 17.29                 | 728.42                        | 154.14                | 734.33                        | 40.38                 |
| 745.77                        | 17.66                 | 758.97                        | 0.37                  | 776.60                        | 37.40                 |
| 782.52                        | 72.94                 | 784.05                        | 4.20                  | 788.51                        | 70.01                 |
| 799.71                        | 24.11                 | 801.07                        | 20.87                 | 811.37                        | 24.54                 |
| 839.87                        | 2.73                  | 840.56                        | 3.87                  | 843.58                        | 88.62                 |
| 848.24                        | 73.73                 | 849.03                        | 108.79                | 855.13                        | 10.31                 |
| 869.48                        | 7.82                  | 873.58                        | 121.63                | 880.11                        | 6.12                  |
| 905.79                        | 2.07                  | 908.13                        | 30.93                 | 915.72                        | 80.76                 |
| 919.70                        | 18.90                 | 934.82                        | 70.79                 | 936.47                        | 29.12                 |
| 938.56                        | 17.63                 | 942.00                        | 4.30                  | 946.28                        | 47.44                 |
| 985.48                        | 71.66                 | 1004.16                       | 0.34                  | 1007.30                       | 1.16                  |
| 1010.98                       | 49.77                 | 1011.50                       | 20.16                 | 1023.68                       | 437.06                |
| 1025.70                       | 2.46                  | 1045.56                       | 9.37                  | 1048.47                       | 0.21                  |
| 1051.68                       | 0.38                  | 1067.44                       | 18.24                 | 1073.25                       | 73.94                 |
| 1074.10                       | 14.23                 | 1085.78                       | 159.31                | 1099.34                       | 119.93                |
| 1109.50                       | 12.71                 | 1123.20                       | 235.13                | 1134.25                       | 6.85                  |
| 1147.50                       | 14.83                 | 1151.10                       | 2659.52               | 1156.66                       | 282.79                |
| 1160.06                       | 24.18                 | 1177.04                       | 14.12                 | 1180.52                       | 706.20                |
| 1186.89                       | 8.94                  | 1200.12                       | 1197.70               | 1210.59                       | 595.08                |
| 1226.90                       | 266.04                | 1227.50                       | 526.13                | 1238.67                       | 109.34                |
| 1244.64                       | 238.77                | 1255.73                       | 9.45                  | 1261.75                       | 9.57                  |
| 1262.37                       | 738.75                | 1264.60                       | 167.54                | 1273.50                       | 887.99                |
| 1291.14                       | 209.52                | 1298.47                       | 72.46                 | 1314.65                       | 122.64                |
| 1318.22                       | 1245.68               | 1336.30                       | 857.92                | 1341.57                       | 10.56                 |
| 1346.03                       | 24.66                 | 1359.70                       | 11.67                 | 1367.73                       | 222.09                |
| 1371.27                       | 19.92                 | 1385.87                       | 13.97                 | 1388.03                       | 123.27                |
| 1404.13                       | 515.58                | 1416.01                       | 110.67                | 1422.61                       | 16.17                 |
| 1425.43                       | 25.60                 | 1430.43                       | 38.68                 | 1445.49                       | 586.30                |
| 1447.80                       | 2098.87               | 1448.70                       | 235.23                | 1452.88                       | 71.07                 |
| 1470.75                       | 428.26                | 1481.29                       | 80.57                 | 1494.24                       | 2513.03               |
| 1519.27                       | 1637.39               | 1521.86                       | 744.93                | 1527.08                       | 2030.63               |
| 1544.57                       | 2158.53               | 1547.23                       | 192.13                | 1582.23                       | 6760.83               |
| 1606.95                       | 289.81                | 1629.01                       | 366.15                | 1646.97                       | 407.71                |
| 1657.99                       | 203.41                | 1662.20                       | 213.57                | 1670.91                       | 279.27                |
| 1676.30                       | 1606.96               | 1682.75                       | 295.73                | 1690.23                       | 536.74                |
| 1704.01                       | 345.18                | 1706.03                       | 510.59                | 1712.48                       | 1079.29               |
| 1726.51                       | 242.95                | 1730.05                       | 24.25                 | 2346.52                       | 316.26                |
| 2362.90                       | 939.78                | 3050.97                       | 39.92                 | 3057.42                       | 17.41                 |
| 3075.65                       | 43.22                 | 3115.89                       | 33.08                 | 3142.28                       | 46.51                 |
| 3143.84                       | 19.50                 | 3214.58                       | 0.27                  | 3224.19                       | 0.16                  |
| 3225.13                       | 3.00                  | 3227.31                       | 5.73                  | 3234.44                       | 1.80                  |
| 3235.95                       | 27.90                 | 3236.71                       | 4.21                  | 3237.84                       | 7.45                  |
| 3240.01                       | 32.03                 | 3240.17                       | 1.25                  | 3242.78                       | 0.63                  |
| 3244.67                       | 1.44                  | 3244.74                       | 5.34                  | 3250.89                       | 1.28                  |
| 3255.12                       | 2.66                  | 3259.40                       | 7.79                  | 3296.36                       | 7.14                  |

Table S4: Vibrational frequencies and IR intensities for ground state anionic DCM-IFC (open).

## References

- [1] L. Shi, C. Yan, Z. Guo, W. Chi, J. Wei, W. Liu, X. Liu, H. Tian and W.-H. Zhu, *Nat. Commun.*, 2020, **11**, 793.
- [2] J. Wei, Y. Wu, R. Pu, L. Shi, J. Jiang, J. Du, Z. Guo, Y. Huang and W. Liu, *J. Phys. Chem. Lett.*, 2021, **12**, 4466–4473.
